# Supplementary material for: Design and application of a novel two-amplicon approach for defining eukaryotic microbiota
Source: Microbiome. 2018 Dec 20;6:228. doi: 10.1186/s40168-018-0612-3 (PMC6302507; doi:10.1186/s40168-018-0612-3)
Supplement: Supplementary file 1 — Table S1. Accuracy of taxonomic assignments of 18S and 28S rRNA variable genetic regions. Related to Fig. 1. Table S2. Primer characteristics and TestProbe3.0 results. Related to Fig. 2. Table S3. Amplicon sequencing statistics. Table S4. Read counts for eukaryotic microbes detected by two amplicon methods in patients suffering from SAM. Related to Fig. 3. Table S5. Genome and gene accessions used for comparisons with stool sample DNA and phylogenetic trees. Table S6. Differential abundance analysis of bacteria based on of Blastocystis carriage, using ALDEx2. Related to Fig. 5. Table S7. Association between eukaryote carriage or HIV reactivity and bacterial diversity. Related to Fig. 5. Table S8. Association between eukaryote abundance and clinical characteristics of patients hospitalized for SAM. (XLS 162 kb) [file 40168_2018_612_MOESM1_ESM.xls]

## Sheet: TableS1
Table S1. Accuracy of taxonomic assignments of 18S and 28S rRNA variable genetic regions
					% correctly matched sequences
		SILVA alignment position		Yeast gene position	Protozoa						Helminths						Fungi
Gene1	VR	5ʹ	3ʹ	18S (Z75578), 28S (RDN25-1)	species	genus	phylum	kingdom	n (sequences)	median length	species	genus	phylum	kingdom	n (sequences)	median length	species	genus	phylum	kingdom	n (sequences)	median length
18S	V1	1142	3112	60 - 159	72.3319	86.8133	99.1892	99.4783	15910	97	72.358	80.4828	99.4112	99.8822	3397	96	50.5445	62.4017	98.9867	99.3799	13224	98
18S	V2	3161	6109	174 - 381	87.7175	95.2173	99.7614	99.8196	17187	210	92.4145	96.6346	99.5994	99.6795	3744	215	71.9439	84.0421	99.6351	99.7895	14250	208
18S	V3	7694	10351	445 - 546	69.4901	86.2989	99.3895	99.7525	18181	101	64.8395	77.8387	99.5824	99.9478	3831	102	46.9616	60.2246	99.1663	99.6968	14514	102
18S	V4	15699	21783	634 - 898	91.668	97.2642	99.9117	99.9429	19263	253	96.0072	98.815	99.897	99.9485	3882	255	76.9939	88.381	99.8635	99.925	14657	252
18S	V5	25298	27579	1014 - 1139	70.1521	86.0911	99.268	99.7871	19261	109	65	80.2835	99.6649	99.8711	3880	109	51.9956	67.7083	99.6179	99.8158	14657	109
18S	V7	35132	37810	1315 - 1436	79.8261	91.5104	99.2039	99.5129	19094	108	88.5819	95.464	99.0355	99.7654	3836	106	55.0845	68.7028	99.6633	99.8832	14554	106
18S	V8	40144	41559	1449 - 1610	78.6404	91.5092	99.3738	99.5808	18844	164	72.0961	83.6325	99.3664	99.7888	3788	164	60.6234	74.9435	99.5335	99.7314	14148	164
18S	V9	42548	43061	1646 - 1743	83.3526	93.5039	99.3071	99.5669	17318	96	86.5095	92.7009	99.3752	99.6592	3521	100	68.7566	80.9718	99.1399	99.6454	13254	100
18S	V1V2	1142	6109	60 - 381	91.2434	96.5846	99.8313	99.8662	17187	319	95.8066	98.3173	99.7863	99.8397	3744	322	79.2	89.4737	99.6842	99.8526	14250	319
18S	V2V3	3161	10351	174 - 546	91.6341	97.0684	99.912	99.9505	18181	373	94.675	97.964	99.9217	99.9478	3831	380	78.3175	88.9073	99.7451	99.8553	14514	373
18S	V3V4	7694	21783	445 - 898	94.6691	98.204	99.9377	99.9533	19265	454	97.5786	99.459	100	100	3882	458	82.4384	91.7309	99.9591	99.9932	14657	455
18S	V4V5	15699	27579	634 - 1139	94.8923	98.1573	99.9533	99.9689	19265	477	97.4755	99.4333	99.9485	99.9742	3882	478	82.9911	92.1607	99.9318	99.9591	14657	475
18S	V5V7	25298	37810	1014 - 1436	91.6096	96.7211	99.964	99.9846	19427	409	94.4845	98.3247	99.9227	100	3880	407	73.6713	86.0681	99.925	99.9932	14657	406
18S	V7V8	35132	41559	1315 - 1610	89.7402	96.5225	99.7538	99.7957	19094	300	94.6038	97.9927	99.6872	99.8957	3836	298	73.2148	85.4367	99.7322	99.8833	14564	297
18S	V8V9	40144	43061	1449 - 1743	91.1006	97.1184	99.7187	99.793	18844	293	92.529	96.7529	99.8416	99.9472	3788	297	80.1102	90.3517	99.8305	99.9152	14158	295
28S	V1	4184	6484	100 - 335	91.0603	97.5052	99.896	100	962	234	96.6701	99.4797	100	100	961	240	72.8399	93.8364	99.6544	99.856	3472	236
28S	V2	7778	12092	382 - 636	92.9283	97.6096	99.8008	100	1004	272.5	98.4645	99.8081	99.904	100	1042	420	79.566	94.7576	99.8873	99.9718	3548	254
28S	V3	13134	14267	664 - 800	85.7006	95.3935	99.7121	100	1042	140.5	93.9338	98.5294	99.9081	100	1088	166	64.4247	87.2985	99.6109	99.7777	3598	135
28S	V4	35034	37381	1944 - 2114	87.1819	95.5702	99.4345	99.7172	1061	162	92.3201	98.1407	100	100	1237	182	72.2483	91.3655	99.6414	99.8345	3625	155
28S	V5	49997	51457	2469 - 2604	88.7619	95.8095	99.3333	99.7143	1050	138	93.2868	98.5179	100	100	1147	145	61.0868	84.7283	99.7814	99.9063	3202	134
28S	V6	61038	62782	2991 - 3110	77.5573	91.6031	99.084	99.6947	655	121	63.8229	92.5486	99.46	100	926	121	48.2929	75.6072	99.3312	99.648	2841	120
1Genes were sourced from SILVA v128 Ref_Nr99 (18S) or Ref (28S) datasets. Only variable regions ≥30 nt were analyzed for taxonomic assignment.

## Sheet: TableS2
Table S2. Primer characteristics and TestProbe3.0 results
rRNA Gene	Primer Name	Sequence	Length (nt)	5ʹ Position (18S Z75578; 28S RDN25-1)	3ʹ Position (18S Z75578; 28S RDN25-1)	No. ambiguities	%GC	Reference	Database Searched (2017-Sep-19/20)	Archaea	Bacteria	Eukaryota	Excavata	Amoebozoa	SAR	Alveolata	Rhizaria	Stramenopiles	Fungi	Metazoa	Nematoda	Platyhelminthes
18S	Euk516	GGAGGGCAAGTCTGGT	16	548	563	0	0.63	Wang et al. PLoS ONE. 2014. 9:e90053	SILVA128 SSU RefNr99	22.3	0	94.5	26.6	74.1	97	96.4	97.6	98.4	98	94.6	96.7	91.5
18S	549-566	GAGGGCAAGTCTGGTGCC	18	549	566	0	0.67	Wang et al. PLoS ONE. 2014. 9:e90053	SILVA128 SSU RefNr99	17.6	0	94.7	48.4	74.6	96.8	96.3	97.1	98.1	98	94.5	97.4	91
18S	550f	GGRCMAGBCTGGTGCCAG	18	551	568	3	0.73	Hugerth et al. PLoS ONE. 2014. 9:e95567	SILVA128 SSU RefNr99	0	0	96.2	95.2	96.9	97.7	97.5	97.8	98.2	97.7	95.6	97.5	91.2
18S	R-574	CGGCTGCTGGCACCAGACTTG	21	554	574	0	0.67	Hadziavdic et al. PLoS ONE. 2014. 9:e87624	SILVA128 SSU RefNr99	0.6	0	95.4	91.7	95.7	97.1	96.9	97.3	97.7	97.4	95	97.4	91.3
18S	F-555	AAGTCTGGTGCCAGCAGCCG	20	555	574	0	0.65	Hadziavdic et al. PLoS ONE. 2014. 9:e87624	SILVA128 SSU RefNr99	0.6	0	95.6	93.3	95.8	97.3	97.2	97.4	97.8	97.4	95.3	97.4	91.4
18S	1-18S	CTGGTGCCAGCAGCCGCGGYAA	22	559	580	1	0.71	Machida and Knowlton. PLoS ONE. 2012. 7:e46180	SILVA128 SSU RefNr99	8.5	10.1	93.7	51.1	73.5	96.6	96.2	96.4	97.6	96.6	94.1	97.3	90.2
18S	515-533	GTGYCAGCMGCCGCGGTAA	19	562	580	2	0.71	Wang et al. PLoS ONE. 2014. 9:e90053	SILVA128 SSU RefNr99	97.2	97.2	94.4	51.2	73.9	97	96.8	96.4	97.7	96.9	95.3	97.5	90.6
18S	562-579	GTGCCAGCAGCCGCGGTA	18	562	579	0	0.72	Wang et al. PLoS ONE. 2014. 9:e90053	SILVA128 SSU RefNr99	57.5	97.2	94.3	51.2	73.9	97	96.8	96.4	97.7	96.9	95.1	97.4	90.6
18S	U515F	GTGCCAGCMGCCGCGGTAA	19	562	580	1	0.72	Bates et al. 2012. Lichenologist. 44:137	SILVA128 SSU RefNr99	97	97.2	94.4	51.2	73.9	97	96.8	96.4	97.7	96.9	95.3	97.4	90.6
18S	563f	GCCAGCAVCYGCGGTAAY	18	564	581	3	0.67	Hugerth et al. PLoS ONE. 2014. 9:e95567	SILVA128 SSU RefNr99	53.6	97.3	96.1	97.2	96.2	97.5	97.7	96.5	97.3	97.6	96.2	97.7	90.6
18S	U529R	ACCGCGGCKGCTGGC	15	564	578	1	0.86	Baker et al. J Microbiol Methods. 2003. 55:541	SILVA128 SSU RefNr99	97.3	97.5	94.9	51.2	74.1	97.1	97.1	96.6	97.4	97.6	95.9	97.9	92.3
18S	F-565	CCAGCAGCCGCGGTAATTCC	20	565	584	0	0.65	Hadziavdic et al. PLoS ONE. 2014. 9:e87624	SILVA128 SSU RefNr99	0.4	88.4	93.8	50.2	73.5	96.3	96.3	94.7	97	97.2	93.6	97.7	90.3
18S	Fwd1	CCAGCASCYGCGGTAATTCC	20	565	584	2	0.63	Hugerth et al. PLoS ONE. 2014. 9:e95567	SILVA128 SSU RefNr99	0.4	88.6	95.7	96.9	96.2	97.2	97.6	95.5	97.3	97.7	94.8	97.7	90.5
18S	F-566	CAGCAGCCGCGGTAATTCC	19	566	584	0	0.63	Hadziavdic et al. PLoS ONE. 2014. 9:e87624	SILVA128 SSU RefNr99	0.5	88.5	93.9	50.2	73.5	96.3	96.4	94.7	97	97.3	93.7	97.7	90.2
18S	rv	CAGCASCCGCGGTAATTCCAG	21	566	586	1	0.62	Hugerth et al. PLoS ONE. 2014. 9:e95567	SILVA128 SSU RefNr99	0.4	0.1	95.3	95.9	96.2	97	97.3	95.3	97.1	97.6	94.3	97.6	90
18S	U519F	CAGCMGCCGCGGTAATWC	18	566	583	2	0.65	Wang and Qian. PLoS ONE. 2009. 4: e7401	SILVA128 SSU RefNr99	96.8	97.4	94.4	51	73.5	96.5	96.5	95.6	97.1	97.3	95	97.7	90.2
18S	Uni522R	GWATTACCGCGGCKGCTG	18	566	583	2	0.65	Amann et al. Microbiol Rev. 1995. 59:143	SILVA128 SSU RefNr99	96.8	97.4	94.4	51	73.5	96.5	96.5	95.6	97.1	97.3	95	97.7	90.2
18S	573-589	CGCGGTAATTCCAGCTC	17	573	589	0	0.59	Wang et al. PLoS ONE. 2014. 9:e90053	SILVA128 SSU RefNr99	13.7	0	96.1	96.4	97.4	97	97	95.8	97.9	98.2	95	97	89.9
18S	F-573	CGCGGTAATTCCAGCTCCA	19	573	591	0	0.58	Hadziavdic et al. PLoS ONE. 2014. 9:e87624	SILVA128 SSU RefNr99	0.7	0	95.7	96.1	97	96.7	96.5	95.7	97.7	98.1	94.3	95.3	89.6
18S	F-574	GCGGTAATTCCAGCTCCAA	19	574	592	0	0.53	Hadziavdic et al. PLoS ONE. 2014. 9:e87624	SILVA128 SSU RefNr99	0	0	95.6	95.9	97	96	96.4	91.7	97.5	98.1	94.2	94.4	89.5
18S	574f	CGGTAAYTCCAGCTCYAV	18	575	592	3	0.53	Hugerth et al. PLoS ONE. 2014. 9:e95567	SILVA128 SSU RefNr99	0.1	0	96.4	96.6	97.4	97	96.7	96.4	98.3	98.2	95.6	95.3	90.9
18S	574'f	CGGTAAYTCCAGCTCYV	17	575	591	3	0.57	Hugerth et al. PLoS ONE. 2014. 9:e95567	SILVA128 SSU RefNr99	11.9	0	96.6	97.4	97.4	97.2	96.8	97.1	98.3	98.3	95.9	97	90.9
18S	Euk528	CGGTAATTCCAGCTCC	16	575	590	0	0.56	Wang et al. PLoS ONE. 2014. 9:e90053	SILVA128 SSU RefNr99	4.2	0	96.2	96.8	97.4	97.1	96.8	96.5	98.2	98.3	94.7	96.5	89.8
18S	616f	TTAAAAVGYTCGTAGTYG	18	617	634	3	0.33	Hugerth et al. PLoS ONE. 2014. 9:e95567	SILVA128 SSU RefNr99	15.7	13.7	94.8	58.2	96.9	95.5	94.7	96.5	97.1	96.6	95.8	96.8	91.4
18S	Euk690	TCAGAGGTGAAATTCTTGGAT	21	896	916	0	0.38	Wang et al. PLoS ONE. 2014. 9:e90053	SILVA128 SSU RefNr99	0	0	82.3	13.6	48.5	83.2	87	48.6	95	82.1	82.6	81	40.3
18S	897f	TCYDAGAATTYCACCTCT	18	898	915	3	0.4	Hugerth et al. PLoS ONE. 2014. 9:e95567	SILVA128 SSU RefNr99	0	11.7	93.6	68.4	69.5	95.6	96.2	90.7	97	90.1	94.9	96.1	94.5
18S	Rev3	ACTTTCGTTCTTGATYRA	18	964	981	2	0.31	Hugerth et al. PLoS ONE. 2014. 9:e95567	SILVA128 SSU RefNr99	0	0	88	58.1	98.2	95.8	95.8	92.8	97.8	66.9	92.6	97.7	45.9
18S	Ab906F	GAAACTTAAAKGAATTG	17	1130	1146	1	0.25	Baker et al. J Microbiol Methods. 2003. 55:541	SILVA128 SSU RefNr99	94.3	46.3	79.7	59.4	96.3	77.7	90.2	96.2	31.5	45.8	94.7	83	95.4
18S	U906R	CAATTCMTTTAAGTTTC	17	1130	1146	1	0.25	Baker et al. J Microbiol Methods. 2003. 55:541	SILVA128 SSU RefNr99	94.3	46.3	79.7	59.4	96.3	77.7	90.2	96	31.5	45.8	94.7	83	95.4
18S	2-18S	AACTTAAAGRAATTGACGGA	20	1132	1151	1	0.32	Machida and Knowlton. PLoS ONE. 2012. 7:e46180	SILVA128 SSU RefNr99	93.7	78	96.3	94.8	95.5	95.5	94.3	96.9	97.9	97.5	96.8	98.5	95.5
18S	1132f/r	CCGTCAATTHCTTYAART	18	1133	1150	3	0.33	Hugerth et al. PLoS ONE. 2014. 9:e95567	SILVA128 SSU RefNr99	94.9	78.5	96.7	95.9	95.7	95.8	94.7	97.2	98.1	97.7	97.2	98.6	95.8
18S	1141-1161	GAATTGACGGAAGGGCACCAC	21	1141	1161	0	0.57	Wang et al. PLoS ONE. 2014. 9:e90053	SILVA128 SSU RefNr99	1.1	0	92.6	29.5	89.5	93.2	91.7	94	96.7	94.6	94.3	93.4	94
18S	1119r	GGTGCCCTTCCGTCA	15	1145	1159	0	0.67	Bates et al. Lichenologist. 2012. 44:137	SILVA128 SSU RefNr99	1.4	0	93.3	30.3	92.9	94.1	92.7	94.7	97.5	95.2	94.8	93.4	94.7
18S	R-1196	TGTTGAGTCAAATTAAGC	18	1179	1196	0	0.33	Hadziavdic et al. PLoS ONE. 2014. 9:e87624	SILVA128 SSU RefNr99	14.9	0.1	96.8	91	97.2	96.4	95.8	96.5	98.2	97	97.4	99	93.6
18S	R-1200	CCCGTGTTGAGTCAAATTAAGC	22	1179	1200	0	0.46	Hadziavdic et al. PLoS ONE. 2014. 9:e87624	SILVA128 SSU RefNr99	0	0	95.9	86.3	97.1	95.6	94.9	95.6	97.8	96.9	96.3	98.7	93.1
18S	1181-1204	TTAATTTGACTCAACRCGGG	20	1181	1200	1	0.42	Wang et al. PLoS ONE. 2014. 9:e90053	SILVA128 SSU RefNr99	0.1	0	96.6	89	97.4	96.6	96.2	96.2	98.1	97	96.9	98.8	95.3
18S	1182f	AATTYGACTCAACDCRGG	18	1183	1200	3	0.47	Hugerth et al. PLoS ONE. 2014. 9:e95567	SILVA128 SSU RefNr99	18.6	0	97.6	97	98.9	97.5	97.3	97.2	98.4	97.7	98	98.9	96.8
18S	F-1183	AATTTGACTCAACACGGG	18	1183	1200	0	0.44	Hadziavdic et al. PLoS ONE. 2014. 9:e87624	SILVA128 SSU RefNr99	0.1	0	97.1	95.1	98.6	97.3	97	96.5	98.4	97.6	97.1	98.9	96.2
18S	1266-1286	TGGTGGTGCATGGCCGTTCTT	21	1266	1286	0	0.57	Wang et al. PLoS ONE. 2014. 9:e90053	SILVA128 SSU RefNr99	0.1	0	95.3	63.9	95.8	95.6	95.5	93.5	97.4	97.3	96.7	97.8	95.5
18S	1047-1074	GGWGBTGCATGGYYG	15	1267	1281	4	0.67	Wang et al. PLoS ONE. 2014. 9:e90053	SILVA128 SSU RefNr99	96.5	98.8	97.8	98.6	97	98.1	98.6	95.2	98.5	98	98.2	98.5	96.9
18S	1266f	RGTGGTGCATGGCCGYTB	18	1267	1284	3	0.67	Hugerth et al. PLoS ONE. 2014. 9:e95567	SILVA128 SSU RefNr99	84.1	10.2	96.8	98.3	96.1	96.4	96.4	94.1	98	97.6	97.4	98.5	96
18S	3-18S	GYGGTGCATGGCCGTTSKTRGTT	23	1268	1290	4	0.6	Machida and Knowlton. PLoS ONE. 2012. 7:e46180	SILVA128 SSU RefNr99	0.1	0	94.6	31.6	94.7	95.6	95.7	93.1	97.4	96.6	96.6	97.8	95.4
18S	R-1289	ACTAAGAACGGCCATGCACC	20	1270	1289	0	0.55	Hadziavdic et al. PLoS ONE. 2014. 9:e87624	SILVA128 SSU RefNr99	0	0	94.6	8.6	94.7	96.5	96.9	93.5	97.6	97	96.8	98	95.6
18S	1612r	TRHGTCCCTGCCMTTTGT	18	1613	1630	3	0.53	Hugerth et al. PLoS ONE. 2014. 9:e95567	SILVA128 SSU RefNr99	1	0	95.5	92.1	95.4	95.7	94.8	96.5	97.6	96.1	96.2	97	96.7
18S	R-1631	TACAAAGGGCAGGGACG	17	1615	1631	0	0.59	Hadziavdic et al. PLoS ONE. 2014. 9:e87624	SILVA128 SSU RefNr99	0.4	0	95.1	89.2	94.3	95.2	94.1	96.5	97.7	95.5	96.1	95.3	96.8
18S	5-18S	GTGTGYACAAAGGBCAGGGAC	21	1616	1636	2	0.58	Machida and Knowlton. PLoS ONE. 2012. 7:e46180	SILVA128 SSU RefNr99	0.2	0	95.1	90.3	94.4	95.5	94.6	96	97.6	95.8	95.9	94.5	96.4
18S	1380F	CCCTGCCHTTTGTACACAC	19	1618	1636	1	0.56	Hugerth et al. PLoS ONE. 2014. 9:e95567	SILVA128 SSU RefNr99	0.2	0	95.9	91.9	94.1	96.1	95.3	96.5	98	96.5	96.5	96	96.7
18S	U1391	CYCYTTGTACACACCGCCC	19	1623	1641	2	0.65	Wang et al. PLoS ONE. 2014. 9:e90053	SILVA128 SSU RefNr99	65.2	69.6	95.9	93	95.1	96	95.9	96.2	96.4	96.3	96.5	96.2	96
18S	1624-1642	CCTTTGTACACACCGCCCG	19	1624	1642	0	0.63	Wang et al. PLoS ONE. 2014. 9:e90053	SILVA128 SSU RefNr99	3.8	68.5	95.3	93	94	95	94.9	95.2	95.2	96	96.3	96.1	95.6
18S	F-1624	CCTTTGTACACACCGCCCGTC	21	1624	1644	0	0.62	Hadziavdic et al. PLoS ONE. 2014. 9:e87624	SILVA128 SSU RefNr99	3.6	67.6	94.5	93	93.6	94	94	94.5	93.9	95.6	95.8	95.5	95.4
18S	1389F	TTGTACACACCGCCC	15	1627	1641	0	0.6	Hugerth et al. PLoS ONE. 2014. 9:e95567	SILVA128 SSU RefNr99	68.6	78.4	96.7	95.4	96.1	97.4	97.8	96.9	96.8	96.7	97.2	96.7	96.3
18S	1390-1407	TTGYACACACCGCCCGTC	18	1627	1644	1	0.65	Wang et al. PLoS ONE. 2014. 9:e90053	SILVA128 SSU RefNr99	68.7	78.4	95.2	94.7	94.8	95.2	95.5	95	94.3	95.8	96.4	95.7	95.7
18S	1626r	GACRGGMGGTGTGBACAA	18	1627	1644	3	0.6	Hugerth et al. PLoS ONE. 2014. 9:e95567	SILVA128 SSU RefNr99	65.6	76.6	95.6	95.1	94.6	95.9	96.4	95.5	94.8	96	96.5	95.8	95.8
18S	UA1406R	ACGGGCGGTGTGTRCAA	17	1627	1643	1	0.63	Baker et al. J Microbiol Methods. 2003. 55:541	SILVA128 SSU RefNr99	71.2	79.2	95.4	94.8	94.8	95.4	95.7	95.2	94.4	95.9	96.6	96.2	95.7
18S	UA1406R_degen	ACGGGCGGTGWGTRCAA	17	1627	1643	2	0.63		SILVA128 SSU RefNr99	71.3	79.5	95.4	94.8	94.8	95.4	95.7	95.2	94.4	95.9	96.6	96.2	95.7
18S	Uni1390R	GACGGGCGGTGTGTACAA	18	1627	1644	0	0.61	Zheng et al. Appl Environ Microbiol. 1996. 62:4504	SILVA128 SSU RefNr99	65.5	76.4	95.2	94.7	94.6	95.1	95.5	95	94.3	95.8	96.4	95.6	95.7
18S	1391F	GTACACACCGCCCGTC	16	1629	1644	0	0.69	Hugerth et al. PLoS ONE. 2014. 9:e95567; EMP	SILVA128 SSU RefNr99	70.8	88	95.5	97.8	96	95.5	95.8	95.2	94.7	96	96.7	95.5	95.8
18S	1629-1647	GTACACACCGCCCGTCGCT	19	1629	1647	0	0.68	Wang et al. PLoS ONE. 2014. 9:e90053	SILVA128 SSU RefNr99	20.8	64.4	94.9	97.1	94.7	95	95.4	94.9	94.1	95.6	96.2	94.8	95.3
18S	Uni1392R	ACGGGCGGTGTGTRC	15	1629	1643	1	0.71	Lane et al. PNAS. 1985. 82: 6955	SILVA128 SSU RefNr99	75.2	91.2	95.8	97.9	96	95.7	96.1	95.4	94.9	96.2	96.9	96.1	95.8
18S	1492-1507	AAGTCGTAACAAGGTW	16	1755	1770	1	0.38	Wang et al. PLoS ONE. 2014. 9:e90053	SILVA128 SSU RefNr99	82.8	76.6	74.8	70.2	81	87.3	88.4	89.2	82.1	52.9	77.5	87.8	57.8
18S	1755-1772	AAGTCGTAACAAGGTWKC	18	1755	1772	2	0.41	Wang et al. PLoS ONE. 2014. 9:e90053	SILVA128 SSU RefNr99	80.5	70.1	71.8	68.1	79.2	85.8	87.2	86.7	80.7	47.7	74	84.6	55.3
18S	U1492	AAGTCGTAACAAGGTAGCCGT	21	1755	1775	0	0.48	Wang et al. PLoS ONE. 2014. 9:e90053	SILVA128 SSU RefNr99	48.3	42.4	3	27	16.6	4.2	3.1	8.9	4	1.5	2.3	19.7	0.3
18S	1510R	CCTTCYGCAGGTTCACCTAC	20	1774	1793	1	0.58	Hugerth et al. PLoS ONE. 2014. 9:e95567	SILVA128 SSU RefNr99	1.4	0.1	40.8	40.2	37.8	70.5	77.6	55.2	55.2	19.1	28.2	18.4	29.1
18S	EukBr	TGATCCTTCTGCAGGTTCACCTAC	24	1774	1797	0	0.5	Hugerth et al. PLoS ONE. 2014. 9:e95567 (aka EukB; EMP)	SILVA128 SSU RefNr99	0	0	37.6	37	36.7	67.2	74.9	52.7	48.8	17.1	23.6	16.3	17.6
18S	SSU_PrimV4_1	GCGGTAATTCCAGCTC	16	574	589	0	0.56	This study	SILVA128 SSU RefNr99	13.7	0	96.4	97.2	97.6	97.2	97.1	96.3	98	98.2	95.3	97.1	90.2
18S	SSU_PrimV4_2	AAGAATTTCACCTCTGA	17	896	912	0	0.35	This study	SILVA128 SSU RefNr99	12.3	11.6	92.8	68.6	68.9	95.6	96.9	88.2	96.9	88.3	93.9	94.8	94.6
18S	SSU_PrimV4_2a	AAGAATTYCACCTCTGA	17	896	912	1	0.38	This study	SILVA128 SSU RefNr99	12.3	11.6	92.8	68.6	68.9	95.7	97	88.2	96.9	88.3	93.9	94.8	94.7
18S	SSU_PrimV4_3	CTAAGAATTYCACCTC	16	899	914	1	0.4	This study	SILVA128 SSU RefNr99	0	16.4	93.1	68.6	69.2	95.3	96.1	89	97.2	89.7	94	96	90
18S	SSU_PrimV4_4	GCCMTTCCGTCAATTCC	17	1140	1156	1	0.56	This study *similar to 1119r	SILVA128 SSU RefNr99	1.3	0.3	95.6	95.4	94.6	95.9	95.3	96.9	97.3	93.4	97.3	98.2	95.9
18S	SSU_PrimV4_4b	GCCMTTCCGTCAATTYC	17	1140	1156	2	0.53	This study	SILVA128 SSU RefNr99	1.3	0.3	96.7	95.5	94.9	96.2	95.3	97.1	98.2	97.7	97.6	98.4	96
18S	SSU_PrimV4_4c	GCCCTTCCGTCAATTYC	17	1140	1156	1	0.56	This study	SILVA128 SSU RefNr99	1.3	0.3	96.2	88.7	94.9	95.6	94.5	96.7	98	97.7	97.2	97.5	96
18S	SSU_PrimV4_6	GGTGCCMTTCCGTCAATTCC	20	1140	1159	1	0.58	This study	SILVA128 SSU RefNr99	1.3	0	94.8	94.4	91.9	94.2	92.8	95.8	96.8	94.8	96.1	96.6	95.1
18S	SSU_PrimV5_2	GGTGCCCTTCCGTCAATTYC	20	1140	1159	1	0.58	This study	SILVA128 SSU RefNr99	1.3	0	93.4	30.4	92.2	94.2	92.8	95.8	97.2	96.4	94.7	94.1	94.2
18S	SSU_PrimV4_6	GTGGTGCCCYTCCGTCAA	18	1144	1161	1	0.65	This study	SILVA128 SSU RefNr99	1.1	0	92.6	26.9	66	93.5	92	94.2	97	94.9	94.5	93.3	94.3
18S	SSU_PrimV4_5	GTGGTGCCMTTCCGTCA	17	1145	1161	1	0.63	This study	SILVA128 SSU RefNr99	1.1	0	94.5	85.4	66.1	93.6	92.1	94.5	97.2	95.7	95.8	95.9	95.2
18S	SSU_PrimV5_R-1200mod	GGYTTAATTTGACTCAACACGG	22	1178	1199	1	0.43	This study	SILVA128 SSU RefNr99	0.1	0.1	96	88.7	96.9	95.9	95.3	95.8	97.6	96.7	96.5	98.6	93.9
18S	SSU_PrimV9_8	GTCCCTGCCMTTTGTACAC	19	1616	1634	1	0.56	This study	SILVA128 SSU RefNr99	0.2	0	95.1	91.4	94.1	95.5	94.6	96.1	97.6	95.3	95.9	95.4	96.6
18S	SSU_PrimV9_9	CCTGCCMTTTGTACACACC	19	1619	1637	1	0.56	This study	SILVA128 SSU RefNr99	0.1	0	95.9	92.2	94.1	96	95.1	96.5	98.1	96.5	96.6	96.3	97
18S	SSU_PrimV9_10	GCCMTTTGTACACACCG	17	1622	1638	1	0.56	This study	SILVA128 SSU RefNr99	0.4	0.2	96.2	92.3	95.4	96.4	95.8	96.6	98	96.6	96.7	96.7	97.1
18S	SSU_PrimV9_11	GCCCTTTGTACACACCG	17	1622	1638	0	0.59	This study	SILVA128 SSU RefNr99	0.4	0.2	96.1	91.7	95.4	96.4	95.8	96.6	98	96.6	96.6	95.8	97.1
18S	SSU_PrimV9_1	TGTACACACCGCCCGTCG	18	1628	1645	0		This study	SILVA128 SSU RefNr99	63.2	82.5	95.1	94.7	95.5	95.2	95.7	95.1	94.2	95.8	96.4	95.3	95.6
18S	SSU_PrimV9_6	CGACTTYTSCTTCCTCTA	18	1743	1760	2	0.47	This study	SILVA128 SSU RefNr99	3.7	0	71.9	63.1	79.5	81.8	84	83.2	74.4	74.2	61.9	23.4	69.4
18S	SSU_PrimV9_5	CGACTTYTSCTTCCTC	16	1745	1760	2	0.53	This study	SILVA128 SSU RefNr99	6.9	0	76.8	69.1	81.7	82.9	84.9	84.1	75.9	78.1	71.2	23.9	70.8
18S	SSU_PrimV9_12	CCTTGTTACGACTTCTSCTTCC	22	1747	1768	1	0.5	This study	SILVA128 SSU RefNr99	7.7	0.2	33	23.8	60.5	73.5	76.1	65.4	71.8	0.3	0.3	0.1	0.2
18S	SSU_PrimV9_15	CCTTGTTACGACTTYTVCTTCC	22	1747	1768	2	0.45	This study	SILVA128 SSU RefNr99	17.8	0.2	71.9	68.9	76.9	81.3	82.3	87.7	73.3	59	73.1	58.2	76.9
18S	SSU_PrimV9_13	CCTTGTTACGACTTYTVC	18	1751	1768	2	0.44	This study	SILVA128 SSU RefNr99	19.7	55.1	74.7	71.4	79.2	86.7	87.7	90.4	80.7	62.1	73.8	61	62.1
18S	SSU_PrimV9_14	CCTTGTTACGACTTYTSC	18	1751	1768	2	0.47	This study	SILVA128 SSU RefNr99	19.7	55.1	74.5	71.4	79.2	86.7	87.7	90.3	80.7	61.6	73.4	60.8	61.5
18S	SSU_PrimV9_16	ACCTTGTTACGACTTYTVC	19	1751	1769	2	0.41	This study	SILVA128 SSU RefNr99	19.5	54.3	73	69.8	78.8	85.3	86.5	89.7	78.1	59.6	72.3	60.4	58.8
18S	SSU_PrimV9_4b	CCTTGTTACGACTTYTB	17	1752	1768	2	0.4	This study	SILVA128 SSU RefNr99	52.3	65.8	75.5	71.6	79.6	87.3	88.3	90.7	81.6	62.7	74.7	61.8	62.1
18S	SSU_PrimV9_3	ACCTTGTTACGACTTYT	17	1753	1769	1	0.38	This study	SILVA128 SSU RefNr99	51.3	66.1	75.3	70.4	79.5	87	87.9	90.3	81.8	60.7	76.1	87.2	59.3
18S	SSU_PrimV9_2b	WACCTTGTTACGACTTT	17	1754	1770	1	0.35	This study	SILVA128 SSU RefNr99	56.8	66.8	73.5	69.6	79.2	86.7	87.9	88.7	81.4	52.1	76.4	87.5	57.7
18S	SSU_PrimV9_2	AACCTTGTTACGACTT	16	1755	1770	0	0.38	This study	SILVA128 SSU RefNr99	81.4	76	74.6	69.9	80.8	86.9	88	88.9	81.8	52.8	77.4	87.7	57.6
18S	SSU_PrimV9_2a	WACCTTGTTACGACTT	16	1755	1770	1	0.38	This study (rc of primer 1492-1507)	SILVA128 SSU RefNr99	82.8	76.6	74.8	70.2	81	87.3	88.4	89.2	82.1	52.9	77.5	87.8	57.8
18S	SSU_PrimV9_2d	WACCKTGTTACGACTT	16	1755	1770	2	0.4	This study	SILVA128 SSU RefNr99	82.8	76.6	74.8	70.2	81	87.3	88.4	89.2	82.1	52.9	77.5	87.8	57.8
18S	SSU_PrimV9_7	CYGCAGGTTCACCTAC	16	1774	1789	1	0.6	This study	SILVA128 SSU RefNr99	45.3	18.7	57.2	65.6	64.4	75.3	81.1	61.6	63.9	33.2	50.3	65.7	47.7
28S	1-28S	CCGTCTTGAAACACGGDCYRAG	22	637	658	3	0.58	Machida and Knowlton. PLoS ONE. 2012. 7:e46180	SILVA128 LSU Ref	34.8	0	89.5	84.1	95.5	93.2	90.1	90.9	96.2	94.5	91.4	82.7	92.9
28S	2-28S	AGGGGCGAAAGACYAATCGAA	21	906	926	1	0.5	Machida and Knowlton. PLoS ONE. 2012. 7:e46180	SILVA128 LSU Ref	14.2	0.1	93	45.7	92.9	97	97.6	100	96.1	96.6	96.6	96.5	96.3
28S	3-28S	TTTTGGTAAGCAGAACTGGYG	21	1122	1142	1	0.45	Machida and Knowlton. PLoS ONE. 2012. 7:e46180	SILVA128 LSU Ref	0	0	91	28.8	83.3	47.4	89.9	98.9	0.5	95.3	97	94.6	98.7
28S	LSU_Prim_V1_r1.2	ATGCTTAARTTCAGCGGGT	19	26	44	1	0.44	This study	SILVA128 LSU Ref	0	0	88.4	56.5	80	84.8	83	71.6	93.9	94.6	87.1	90.4	91
28S	LSU_Prim_V2_f2	GAGACCGATAGCGAACAAG	19	335	353	0	0.53	This study	SILVA128 LSU Ref	31	3.8	65.8	20	45	49.4	27.3	88.6	59.1	89.5	63.8	6.8	71.2
28S	LSU_Prim_V2_f3	CAAGTACCGTGAGGG	15	350	364	0	0.6	This study	SILVA128 LSU Ref	34	91.2	74.2	5	65	75.1	44.8	96.6	95.6	26.4	91.2	70.9	89.2
28S	LSU_Prim_V2_f4	CAAGTACCGTGAGGGAAAG	19	350	368	0	0.53	This study	SILVA128 LSU Ref	33.7	91.1	73.8	5	65	74.3	44.2	96.6	94.3	26.4	91	70.9	89.2
28S	LSU_Prim_V2_f1	GTACCGTGAGGGAAAGATG	19	353	371	0	0.53	This study	SILVA128 LSU Ref	39	95.9	72.7	0	67.5	74.2	44.2	95.5	94.3	26.4	88.7	68.9	88.6
28S	LSU_Prim_V2_f5	CCGTGAGGGAAAGATG	16	356	371	0	0.56	This study	SILVA128 LSU Ref	39	95.9	74	4.8	65.9	81.2	61.7	95.5	94.3	26.4	89.2	68.9	89
28S	LSU_V2_Rev	TCCGTGTTTCAAGACGGG	18	636	653	0	0.56	This study	SILVA128 LSU Ref	20.3	0	90.3	95.5	95.5	96.1	96.6	90.9	96.7	94.7	91.8	84.4	92.5
28S	LSU_Prim_V2	CCGTCTTGAAACACGG	16	637	652	0	0.56	This study	SILVA128 LSU Ref	36.6	0	90.7	95.5	95.5	96.1	96.6	90.9	96.7	94.9	92	84.6	92.9
28S	LSU_V2_r3.3	GGTCCGTGTTTCAAGACGG	19	637	655	0	0.58	This study	SILVA128 LSU Ref	32.2	0	90	86.4	95.5	93.9	91.5	90.9	96.5	94.6	91.7	84.4	92.9
28S	LSU_Prim_V2_r1	GGTCCGTGTTTCAAGACG	18	638	655	0	0.56	This study	SILVA128 LSU Ref	38.2	0	90.1	86.4	95.5	95.6	95.7	90.9	96.5	94.7	91.7	84.4	92.9
28S	LSU_Prim_V2_r2	CTCCTGGTCCGTGTTTC	17	644	661	0	0.59	This study	SILVA128 LSU Ref	0	0	3.6	0	0	0	0	0	0	0	8.9	0.2	19.6
28S	LSU_Prim_rev1	GTCTTTCGCCCCTATAC	17	902	918	0	0.53	This study	SILVA128 LSU Ref	27.8	21.4	91.6	45.7	78.6	95.3	96.7	84.4	96.6	96.5	94	96	95.1
28S	LSU_Prim_rev5	GTTCGATKAGTCTTTCGCNCC	21	907	927	2	0.53	This study	SILVA128 LSU Ref	4	0.1	92.6	97.8	91.1	95.7	98.1	84.4	96.1	96.1	95.5	96.5	96.5
28S	LSU_Prim_rev6	CGATKAGTCTTTCGCNCC	18	907	924	2	0.56	This study	SILVA128 LSU Ref	5.5	10.6	93.1	97.8	94.6	95.7	98.1	84.4	96.1	96.7	95.8	96.5	96.5
28S	LSU_Prim_rev2	CGATTAGTCTTTCGCC	16	909	924	0	0.5	This study	SILVA128 LSU Ref	0.4	5.2	93.5	39.1	96.4	97.4	98.6	100	96.1	96.9	96	96.5	96.5
28S	LSU_Prim_rev3	GGTTCGATTAGTCTTTCGC	19	910	928	0	0.47	This study	SILVA128 LSU Ref	3.1	0.1	92.9	71.7	80.4	97.2	97.3	100	96.8	95.8	95.4	96.5	96.7

## Sheet: TableS3
Table S3. Amplicon sequencing statistics
PatientID	Stool gDNA (ng/uL)	Total reads
		18S rRNA gene V4V5	transITS	16S rRNA gene V4
037	4.54527	49521	171689	90802
288	0.243466	44050	174060	65964
296	1.67273	82596	56266	101047
297	0.328693	113384	159319	154911
306	0.344508	101108	216565	108857
308	0.332576	114933	162499	109455
312	1.2983	115499	64155	107605
314	2.99763	108067	94463	195915
315	0.237973	114294	127645	48330
342	0.525852	141704	197884	108485
346	0.393371	110480	78422	120821
348	0.201515	108192	203523	89784
452	0.885795	35680	146127	118753
456	0.253883	73796	132839	71789
458	0.158144	94712	170525	46182
463	1.45521	246320	108217	178231
468	0.385133	85901	140326	68640
472	2.17	48758	160935	150983
475	1.10852	68564	156368	188643
478	0.375568	93893	172477	118800
510	0.85161	42158	133163	193542
511	0.85322	47169	112793	127487
518	1.94318	42227	126066	189852
559	0.0514205	74841	105243	29290
572	0.416477	46893	150073	149585
574	0.21	104342	140120	83491
588	1.52718	26115	182140	195152
593	0.271875	148072	176657	110816
601	0.101515	141423	127434	73665
603	0.310133	124571	118201	67149
605	0.389489	82958	186177	74119
612	0.123674	28202	130719	54909
613	2.08674	118212	180359	194805
615	3.73911	N/A	203546	187026
616	0.869886	41651	139699	180979
617	0.95	126674	199701	152168
618	1.22055	N/A	96016	177523
627	1.73551	77299	96798	153823
628	1.58684	118656	91699	182136
629	0.288636	71416	146051	60118
632	0.151231	56392	127863	80851
633	1.116	151127	174903	81515
634	0.480398	123951	235123	68642
637	0.201515	62529	148236	41403
639	7.90568	89476	152510	70505
660	5.07263	48638	205360	176101

## Sheet: TableS4
Table S4. Eukaryotic microbes detected by two amplicon methods in patients suffering from SAM
	18S rRNA gene V4V5		transITS
Taxon	Reads1	No. patients with ≥5 reads2	Reads1	No. patients with ≥5 reads2
Stramenopiles
Blastocystis	160665	15	129488	12
Blastocystis sp. ST1	42254	5	25948	6
Blastocystis sp. ST2	4947	3	1282	6
Blastocystis sp. ST3	113255	8	39429	7
Blastocystis sp. ST3	-	-	378	4
Blastocystis sp. ST6	38	3	9	1
Blastocystis sp. ST7	-	-	136	3
Blastocystis sp. ST8	-	-	117	3
Blastocystis sp. ST9	-	-	6	-
Blastocystis unknown ST	171	5	62183	-
Spumella	-	-	6	1
Anthophysa	-	-	15	2
Apicomplexa
Cryptosporidium	1408	12	-	-
Eimeriorina (unknown genus)	1032	24	-	-
Gregarina	11	1	-	-
Toxoplasma gondii			18	1
Dinoflagellata
Peridiniales (unknown genus)	49	1
Metamonada
Trichomonas	6534	37	127	3
Tritrichomonas	6212	38	135	2
Tetratrichomonas	14	1	-	-
Pentatrichomonas	50223	2	5003	2
Trichomonad (unknown genus)	18714	2
Percolozoa
Tetramitia (unknown genus)	64	2	-	-
Amoebozoa
Entamoeba	42064
Entamoeba coli	42064	1	784	1
Microsporidia
Enterocytozoon			64209	12
Helminths
Cyclophyllidea (unknown genus)	5313	1
Tricladida	138	7	-	-
Rhabditida	23	1	-	-
Thysanotaenia congolensis	-	-	8613	1
Taenia	-	-	158	1
Raillietina	-	-	144	1
Fuhrmannetta	-	-	25	1
Fergusobia	-	-	686	11
Caenorhabditis	-	-	51	1
1Reads refer to the total number of sequences classified to taxon.
2Total patients = 44 for 18S rRNA gene V4V5 and 46 for transITS amplicon studies.

## Sheet: TableS5
Table S5. Genome and gene accessions used for comparisons with stool sample DNA and phylogenetic trees
Organism	Accession	Reference
Blastocystis sp. subtype 1	GCA_001651215.1	Gentekaki E. et al. (submitted MAY-2016 Unpublished)
Blastocystis sp. subtype 2	GCA_000963365.1	Andersen et al. (submitted 10-MAR-2015 Unpublished)
Blastocystis sp. subtype 3	GCA_000963385.1	Andersen et al. (submitted 10-MAR-2015 Unpublished)
Blastocystis sp. subtype 4	GCF_000743755.1	Wawrzyniak et al. (2015) Genomics Data 4:22.
Blastocystis sp. subtype 6	GCA_000963415.1	Andersen et al. (submitted 10-MAR-2015 Unpublished)
Blastocystis sp. subtype 7	GCF_000151665.1	Andersen et al. (submitted 10-MAR-2015 Unpublished)
Blastocystis sp. subtype 8	GCA_000963455.1	Andersen et al. (submitted 10-MAR-2015 Unpublished)
Blastocystis sp. subtype 9	GCA_000963465.1	Andersen et al. (submitted 10-MAR-2015 Unpublished)
Blastocystis sp. subtype 14 Cow1	KC148205
Blastocystis sp. subtype 14 Mouflon	KC148206
Blastocystis sp. subtype 10 CA6	KC148207
Blastocystis sp. subtype 17 Gundi	KC148208
Blastocystis sp. subtype 13 Mousedeer	KC148209
Blastocystis sp. subtype 15 CA25	KC148210
Babesia microti	AB050732
Isospora robini	AF080612
Cryptosporidium muris	AF093498
Hammondia hammondi	AF096498
Cyclospora cayetanensis	AF111183
Cryptosporidium parvum	AY204235
Cryptosporidium andersoni	DQ060422
Cryptosporidium baileyi	DQ898161
Cryptosporidium meleagridis	EF179381
Peridinium bipes	AF231805
Eimeria tenella	EF210325
Cryptosporidium fragile	EU162752
Gregarina polymorpha	FJ459748
Gregarina tropica	FJ459749
Sarcocystis elongata	GQ251017
Hammondia heydorni	GQ984224
Gregarinasina gen. sp. 1 KCW-2013	JX535336
Sarcocystis hominis	JX679471
Balantidium duodeni	KM057846
Toxoplasma gondii	U00458
Neospora caninum	U03069
Trichomonas vaginalis G3	AAHC01011643
Tritrichomonas augusta	AY055802
Dientamoeba fragilis	AY730405
Tritrichomonas muris	AY886846
Tetratrichomonas sp. IVB	AY886851
Trichomonas sp. 5 AP-2012	JX512960
Pentatrichomonas hominis	KC594038
Tritrichomonas sp. MEG-2016a	KX000921
Tritrichomonas foetus	M81842

## Sheet: TableS6
Table S6. Differential abundance analysis of bacteria based on of Blastocystis carriage using ALDEx2
Blastocystis carriage (minimum read cutoff)		2	5	50	100	2	5	50	100	2	5	50	100	2	5	50	100	2	5	50	100
OTU	Genus	effect				FDR-p (Wilcoxon rank sum)				p (Wilcoxon rank sum)				FDR-p (Welch's t)				p (Welch's t)
OTU1984	Oscillibacter	1.31599	1.51009	1.37317	1.23444	0.000588947	0.000131383	0.00534756	0.0415497	1.28414e-06	2.38931e-07	9.57209e-06	0.000100449	0.00041275	7.67752e-05	0.000865963	0.0055292	8.25875e-07	1.49181e-07	9.42941e-07	7.55181e-06
OTU1542	Sporobacter	1.3764	1.49659	1.2539	1.10456	0.00030902	0.00024026	0.00592264	0.0465814	5.7365e-07	5.44507e-07	1.61272e-05	0.000189346	0.000720033	0.000578359	0.00810524	0.0278135	1.67531e-06	1.97591e-06	6.56586e-05	0.000293913
OTU2302	Cellulosibacter	1.11778	1.24174	1.02564	0.955944	0.0120703	0.00317319	0.0398441	0.0950177	0.000110015	2.63479e-05	0.000640804	0.00193417	0.0478574	0.0195958	0.085384	0.193007	0.00337415	0.000867815	0.00568893	0.0180782
OTU1365	Roseburia	0.871562	1.024	1.01756	0.976153	0.0301643	0.00647799	0.0533893	0.0851101	0.000344082	5.63343e-05	0.000813194	0.00121665	0.0236431	0.00221221	0.00395442	0.00767788	0.000175293	1.10644e-05	1.20587e-05	1.88185e-05
OTU1544	Flavonifractor	0.800317	1.00353	1.00401	0.937416	0.034817	0.00685526	0.0206978	0.0788519	0.000510877	7.18649e-05	0.000149901	0.00090796	0.0613889	0.0120458	0.00375668	0.0154	0.00251688	0.000368051	1.23835e-05	9.13421e-05
OTU6836	Blautia	0.698935	0.909852	0.832842	0.803088	0.0443343	0.00762204	0.0614976	0.0999862	0.000809222	8.32807e-05	0.00112335	0.00187907	0.140069	0.0247076	0.00629175	0.0162628	0.00711308	0.00122068	3.89595e-05	9.33847e-05
OTU1532	Ruminococcus	0.769384	0.824649	0.808175	0.783213	0.0334656	0.00779639	0.0411801	0.0959379	0.000546049	0.000100022	0.000567937	0.00184879	0.13519	0.0561281	0.194851	0.287994	0.00610957	0.00279412	0.0152012	0.0212224
OTU3084	Bilophila	0.854102	1.01377	0.86964	0.752875	0.0349054	0.00845745	0.0637117	0.191293	0.000648347	0.00013176	0.00151577	0.00896263	0.0814441	0.0222742	0.0654242	0.187751	0.0057269	0.00136216	0.0035707	0.0217184
OTU1276	Clostridium XlVb	0.812644	0.936996	0.856774	0.838447	0.03595	0.0101329	0.0560752	0.108128	0.000612003	0.0001544	0.000956401	0.00226236	0.078356	0.0295712	0.0693366	0.134165	0.00290292	0.00100672	0.00237718	0.00468865
OTU3914	Intestinimonas	0.768324	0.984897	0.839596	0.659665	0.0420172	0.0102023	0.0899916	0.226709	0.000842123	0.000159691	0.00265835	0.0123329	0.0872167	0.0305126	0.0917033	0.206264	0.00387652	0.00134392	0.00904183	0.0188054
OTU1372	Lachnospiracea_incertae_sedis	0.734051	0.845814	0.773966	0.854397	0.0428898	0.0116242	0.0799341	0.0773003	0.000731418	0.000176468	0.00197491	0.000795247	0.0411542	0.00929802	0.0323996	0.0238994	0.000501117	0.000102952	0.000575186	0.000212823
OTU1641	Clostridium IV	0.756671	0.821278	1.01011	0.852049	0.0463393	0.0152579	0.0158465	0.0792996	0.00116826	0.000355878	0.000112964	0.00118783	0.119269	0.0749861	0.0866717	0.240215	0.00501425	0.00417507	0.00367737	0.0173013
OTU2148	Eubacterium	0.87077	0.917671	0.83094	0.715617	0.039301	0.0176495	0.102523	0.211521	0.000976346	0.000454516	0.00411309	0.0123112	0.0532448	0.0314287	0.121294	0.217186	0.00146702	0.00123941	0.00881773	0.0194525
OTU2115	Gemmiger	0.662362	0.773255	0.714106	0.669828	0.0755879	0.0196451	0.100478	0.165498	0.00218121	0.000441785	0.00316916	0.00568458	0.141915	0.0349455	0.0346608	0.0867571	0.00842575	0.0012605	0.000667757	0.00193223
OTU3195	Anaerosporobacter	0.782435	0.827238	0.88267	0.814044	0.0535954	0.0205055	0.0371963	0.0724432	0.00181406	0.00062343	0.000660507	0.00113534	0.129211	0.084716	0.101423	0.0984122	0.012086	0.00905257	0.0107128	0.00551622
OTU85610	Anaerovorax	0.788555	0.853734	0.63476	0.53896	0.0585965	0.0212761	0.251906	0.348685	0.00204358	0.000656979	0.0239131	0.0391878	0.10655	0.0455688	0.288576	0.385478	0.00685443	0.00233008	0.0339142	0.0607996
OTU3485	Coprococcus	0.658094	0.802392	0.802562	0.779665	0.0927887	0.021439	0.0843515	0.120162	0.00306162	0.000489155	0.00222727	0.00280324	0.188551	0.0458578	0.0111373	0.0253498	0.0115166	0.00266697	0.000109873	0.00024115
OTU3081	Butyricicoccus	0.707401	0.841896	0.846533	0.874327	0.0843752	0.0227775	0.0711734	0.0834567	0.0027029	0.000559659	0.00155994	0.0011638	0.10238	0.0163802	0.00645824	0.0110127	0.00626136	0.000501911	4.10263e-05	4.40795e-05
OTU11597	Mogibacterium	0.803566	0.888496	0.674521	0.51824	0.0588346	0.0233963	0.202368	0.38213	0.00174497	0.000684534	0.0140847	0.0446852	0.131176	0.067439	0.331736	0.509079	0.00927858	0.00367971	0.0439029	0.10177
OTU9273	Fusicatenibacter	0.627829	0.759334	0.696385	0.70593	0.100349	0.0253758	0.110513	0.15203	0.00365204	0.000655904	0.0038521	0.00485179	0.20655	0.046931	0.0354431	0.0614001	0.0161703	0.00216684	0.000696387	0.00106676
OTU3214	Lactonifactor	0.728936	0.81371	0.834162	0.798261	0.0717464	0.031838	0.0994537	0.145309	0.00264985	0.00134429	0.00433394	0.00570675	0.133542	0.0917417	0.203753	0.275887	0.00847717	0.0073565	0.0142521	0.0213227
OTU102195	Lutispora	0.680171	0.785178	0.713864	0.5846	0.0760891	0.0374921	0.135419	0.276621	0.00354315	0.00163986	0.00839173	0.0268115	0.192765	0.135183	0.301927	0.440998	0.0176161	0.0152723	0.0432026	0.0727466
OTU42949	Hungatella	0.57941	0.719195	0.693606	0.771631	0.143411	0.044129	0.116346	0.114394	0.00663557	0.00150347	0.00424903	0.00261719	0.251049	0.0868217	0.068751	0.0832287	0.0188765	0.00460906	0.00204824	0.00183486
OTU6141	Desulfovibrio	0.839589	0.937047	0.907994	0.76441	0.0727217	0.0471873	0.078735	0.23025	0.0027079	0.00218674	0.00248571	0.0150696	0.104228	0.0856592	0.108157	0.245816	0.00473846	0.00669802	0.00639576	0.0250326
OTU2335	Vampirovibrio	0.631585	0.723476	1.11829	1.15041	0.131156	0.052388	0.0104068	0.0376965	0.00695632	0.00228894	5.0591e-05	0.000112372	0.215544	0.117957	0.0390601	0.0771146	0.0180227	0.00784014	0.00172279	0.00336927
OTU3625	Subdoligranulum	0.644351	0.729516	0.552822	0.517047	0.135666	0.0528273	0.294705	0.385485	0.00785967	0.00226687	0.0283485	0.0456358	0.300829	0.15641	0.508473	0.560758	0.0517598	0.0151809	0.108777	0.139999
OTU62434	Hespellia	0.651593	0.715655	0.714119	0.683415	0.109538	0.0528565	0.122146	0.193863	0.00553846	0.00256044	0.00524898	0.0101949	0.199908	0.128849	0.270068	0.376408	0.0158521	0.0115057	0.0319612	0.0448836
OTU85578	Holdemania	0.643529	0.71139	0.539847	0.509534	0.123466	0.0575054	0.289609	0.418456	0.00727132	0.00294441	0.0325348	0.0601177	0.221601	0.159763	0.418233	0.529945	0.019745	0.0178526	0.0703859	0.112681
OTU1772	Clostridium XlVa	0.48358	0.624619	0.608641	0.618447	0.206246	0.0652672	0.135887	0.167955	0.0123532	0.00261631	0.00548836	0.00582245	0.264551	0.0379874	0.0133773	0.0249504	0.018001	0.00100818	0.000145614	0.000233595
OTU3128	Pseudoflavonifractor	0.667733	0.758657	0.627711	0.45962	0.153477	0.0704293	0.255489	0.496632	0.0106356	0.00389744	0.025948	0.0912476	0.264752	0.163294	0.413164	0.63429	0.0324428	0.0127286	0.068555	0.178737
OTU1297	Lactobacillus	-0.525481	-0.646583	-0.655326	-0.765426	0.237295	0.0758681	0.211455	0.221283	0.0162718	0.00331832	0.0122569	0.0109301	0.31633	0.0830246	0.17783	0.182159	0.0224534	0.00321521	0.00860983	0.00714932
OTU6961	Butyrivibrio	0.507967	0.604634	0.643209	0.696521	0.19581	0.077479	0.152727	0.152667	0.0120812	0.00358066	0.00698052	0.00493138	0.288485	0.107284	0.0979233	0.124979	0.0332457	0.00965999	0.00369997	0.00383813
OTU85579	Odoribacter	0.604364	0.659785	1.11823	0.871729	0.131549	0.0847176	0.0141571	0.0722801	0.006596	0.00466179	8.20996e-05	0.000767356	0.18957	0.131949	0.0146697	0.0608444	0.0126686	0.00901171	0.000182924	0.00116152
OTU1986	Lachnobacterium	0.605735	0.598844	0.421353	0.506553	0.149096	0.08476	0.362453	0.313808	0.0110245	0.00656058	0.0563184	0.0336537	0.248807	0.154806	0.449572	0.416639	0.0305636	0.0179205	0.0880654	0.0719342
OTU3099	Anaerotruncus	0.532627	0.613275	0.596661	0.482751	0.178589	0.097198	0.176137	0.347913	0.0129033	0.00638266	0.0113901	0.0366204	0.306564	0.205899	0.298765	0.479786	0.0392222	0.0293463	0.0439828	0.0965853
OTU1377	Moryella	0.467114	0.614696	0.516268	0.475017	0.251529	0.0973643	0.349572	0.457837	0.0185722	0.00490885	0.035504	0.058454	0.256389	0.053916	0.0861488	0.183256	0.0172091	0.00173937	0.00294767	0.00722122
OTU3907	Coprobacter	0.626816	0.714097	0.949873	0.79085	0.260771	0.126318	0.063136	0.15966	0.0238356	0.00815851	0.00130418	0.00560356	0.289867	0.144056	0.0522039	0.125565	0.0308546	0.0125967	0.00261498	0.00869301
OTU106207	Macromonas	-0.542078	-0.701692	-0.566952	-0.600996	0.310349	0.127002	0.298391	0.367149	0.029833	0.007841	0.0277001	0.0354048	0.250603	0.0508169	0.147786	0.213549	0.0165038	0.001691	0.00743955	0.0109409
OTU85577	Barnesiella	0.580623	0.679418	0.463038	0.32761	0.242161	0.138807	0.514158	0.684634	0.0220062	0.0106361	0.113124	0.218094	0.28074	0.180567	0.571904	0.70891	0.024767	0.016236	0.140693	0.249858
OTU3465	Murimonas	0.470572	0.595287	0.526722	0.510282	0.230036	0.139598	0.260282	0.351453	0.0227818	0.012761	0.0252527	0.0377175	0.301038	0.180333	0.295303	0.389409	0.0423573	0.0248653	0.040363	0.0559789
OTU11919	Melissococcus	-0.480194	-0.532609	-0.588549	-0.502235	0.353376	0.14415	0.220418	0.311021	0.0463286	0.0115945	0.0173597	0.0269111	0.467669	0.261157	0.348238	0.454035	0.0796791	0.0300957	0.0405091	0.0556988
OTU2265	Robinsoniella	0.616558	0.647532	0.595751	0.713006	0.200513	0.149767	0.256119	0.18143	0.0249209	0.0153878	0.0289495	0.0113775	0.234153	0.178732	0.31153	0.251792	0.0276455	0.0174048	0.0347243	0.0179599
OTU3186	Eisenbergiella	0.486947	0.531496	0.58257	0.754341	0.201264	0.154953	0.204804	0.12724	0.0157988	0.0151811	0.0147173	0.00386655	0.287124	0.249302	0.333497	0.204516	0.0322075	0.048698	0.0520579	0.0208011
OTU106284	Candidatus Carsonella	-0.507728	-0.499347	-0.500398	-0.419649	0.149541	0.15729	0.335572	0.450223	0.00940435	0.0147212	0.0431995	0.0778814	0.222902	0.206705	0.344298	0.434223	0.0157698	0.0199917	0.0380484	0.0561384
OTU3282	Variovorax	-0.446687	-0.470176	-0.343248	-0.305962	0.210218	0.1576	0.512861	0.580349	0.0228068	0.0188711	0.124192	0.156609	0.309764	0.252773	0.634364	0.673341	0.0265687	0.0261493	0.175631	0.179776
OTU3208	Saccharofermentans	0.553074	0.582679	0.613111	0.515133	0.23563	0.164886	0.249404	0.439296	0.0327526	0.019042	0.0273068	0.0808002	0.309853	0.226431	0.292329	0.471569	0.0524831	0.0432648	0.0437257	0.106005
OTU86019	Butyricimonas	0.547456	0.622806	0.895034	0.755819	0.265857	0.168516	0.0643342	0.170633	0.0319128	0.0184834	0.00182543	0.00847414	0.325238	0.201022	0.113771	0.230825	0.0484163	0.0244888	0.00697094	0.0226142
OTU2921	Alistipes	0.627345	0.617844	0.83621	0.733966	0.234667	0.179309	0.104371	0.25971	0.0171021	0.0137564	0.00340227	0.0155065	0.209272	0.148841	0.0408968	0.131952	0.0122951	0.0113883	0.000887178	0.00414544
OTU7947	Faecalibacterium	0.459804	0.5999	0.651395	0.592156	0.375643	0.192986	0.319656	0.333834	0.0428792	0.0143555	0.0290214	0.0262678	0.406864	0.185423	0.0505952	0.0602656	0.0482009	0.0142991	0.00116134	0.000961518
OTU3525	Catellicoccus	-0.382338	-0.525014	-0.503462	-0.502384	0.384443	0.19739	0.30423	0.33149	0.0817406	0.0281048	0.0422218	0.0477118	0.47127	0.272834	0.34282	0.361199	0.107461	0.0448726	0.0474702	0.0522709
OTU3591	Ruminococcus2	0.410884	0.536776	0.540175	0.475593	0.372547	0.199969	0.267175	0.429829	0.0424058	0.0157559	0.0200286	0.0488039	0.379544	0.158499	0.136863	0.268566	0.0341362	0.00974577	0.00580678	0.0145074
OTU3339	Papillibacter	0.577543	0.569114	0.628257	0.557902	0.295729	0.200184	0.270035	0.405056	0.039017	0.0281126	0.029542	0.0614805	0.366922	0.286301	0.416572	0.512455	0.060785	0.0530157	0.0844831	0.110428
OTU3187	Acetivibrio	0.478721	0.527705	0.474953	0.538002	0.296783	0.200525	0.334206	0.377371	0.033371	0.0207246	0.0421899	0.0448603	0.358254	0.245413	0.403636	0.432605	0.0541319	0.0344906	0.0899392	0.0844146
OTU19663	Lelliottia	-0.425565	-0.526743	-0.462426	-0.41061	0.30438	0.226765	0.32729	0.473197	0.0340413	0.0249144	0.0385493	0.0786485	0.433404	0.337985	0.451684	0.582796	0.0643068	0.0455158	0.0672498	0.118545
OTU70542	Tatumella	-0.440707	-0.469624	-0.57927	-0.640928	0.329574	0.2356	0.193044	0.19586	0.0321581	0.0216306	0.0109819	0.00862763	0.447389	0.349969	0.302246	0.31363	0.0515454	0.0379632	0.0217744	0.0205851
OTU1402	Syntrophococcus	0.402681	0.417648	0.31086	0.269238	0.35733	0.242407	0.533854	0.581395	0.0534812	0.0283233	0.126898	0.135198	0.548929	0.422266	0.668152	0.707736	0.157117	0.10191	0.266998	0.314412
OTU3310	Oxalobacter	0.42533	0.495795	0.580658	0.493303	0.347739	0.244627	0.300838	0.375601	0.0663265	0.0389413	0.037762	0.0521052	0.427189	0.334805	0.367156	0.436442	0.106974	0.07337	0.0814172	0.101154
OTU98199	Actinobacillus	0.361785	0.460505	0.369745	0.50606	0.453092	0.260965	0.608072	0.414258	0.0735348	0.0268562	0.153083	0.0446747	0.58308	0.381125	0.699495	0.412695	0.141773	0.0633284	0.248907	0.0517219
OTU1546	Acinetobacter	-0.368363	-0.477882	-0.780566	-0.851609	0.454851	0.261366	0.0480587	0.062874	0.0740107	0.0275571	0.000740013	0.000503196	0.534063	0.372223	0.100314	0.137281	0.0856165	0.0419837	0.00371182	0.00447039
OTU6368	Dorea	0.284496	0.42821	0.390317	0.327649	0.476008	0.263944	0.404718	0.576139	0.0825393	0.0268377	0.0501308	0.108533	0.449218	0.0984614	0.0660808	0.137503	0.0642894	0.00423543	0.00185009	0.00423152
OTU6110	Phascolarctobacterium	0.536543	0.597626	0.570887	0.470338	0.39071	0.28072	0.49326	0.667073	0.0588754	0.0386964	0.0977026	0.195859	0.391855	0.281151	0.466621	0.633838	0.045769	0.0336683	0.0719107	0.152742
OTU2126	Marvinbryantia	0.376321	0.493011	0.415009	0.566182	0.41561	0.283729	0.465193	0.409909	0.0672487	0.0368313	0.0756531	0.0453743	0.482322	0.337779	0.478886	0.406707	0.0886334	0.0502634	0.0756717	0.0440637
OTU109268	Catonella	0.378854	0.412721	0.425306	0.333294	0.351012	0.289432	0.337782	0.551245	0.0682058	0.0618954	0.0531453	0.147481	0.479519	0.416847	0.510068	0.641906	0.150033	0.127978	0.176562	0.267917
OTU3218	Acetatifactor	0.434142	0.435382	0.35288	0.325565	0.340167	0.296565	0.4786	0.631716	0.0706057	0.0705513	0.136029	0.247938	0.41862	0.358044	0.537261	0.632244	0.105005	0.099635	0.185755	0.269436
OTU3301	Alkalibaculum	0.405051	0.439577	0.494463	0.375089	0.349416	0.306202	0.312512	0.527013	0.0650117	0.0770977	0.0476116	0.145132	0.415172	0.366294	0.400064	0.57054	0.0846357	0.104335	0.0895471	0.193513
OTU19097	Klebsiella	-0.408698	-0.427347	-0.528113	-0.647102	0.394053	0.312693	0.224806	0.201976	0.0485	0.0383275	0.0141008	0.00890833	0.550234	0.461613	0.344758	0.306998	0.0925282	0.0704027	0.0271543	0.0180307
OTU85278	Buttiauxella	-0.364026	-0.417311	-0.499136	-0.585914	0.3817	0.317864	0.229798	0.23045	0.0450908	0.0402478	0.0148105	0.0121534	0.526568	0.445719	0.362047	0.345226	0.0798395	0.0644009	0.0303016	0.0236912
OTU85589	Anaerofilum	0.355141	0.432435	0.217218	0.133371	0.411254	0.318346	0.730601	0.861449	0.0966366	0.0720235	0.362139	0.570606	0.47459	0.368944	0.69619	0.818171	0.117194	0.0932122	0.295409	0.473017
OTU1265	Enterobacter	-0.386898	-0.408997	-0.516629	-0.597566	0.403464	0.318848	0.243533	0.237137	0.051165	0.0400248	0.0164273	0.0126958	0.567869	0.480443	0.366307	0.330223	0.105074	0.0782331	0.0309701	0.0216652
OTU4157	Catenibacterium	0.372731	0.499578	0.508985	0.468678	0.516268	0.323662	0.456008	0.660107	0.108294	0.0439031	0.0692197	0.172537	0.539973	0.308966	0.370327	0.55929	0.118636	0.0407786	0.0524225	0.114798
OTU11111	Parabacteroides	0.413521	0.555298	0.680474	0.601918	0.544227	0.326206	0.305444	0.470631	0.121912	0.043376	0.026632	0.0629264	0.518121	0.22189	0.0525572	0.129137	0.0943633	0.0228256	0.00128367	0.00373191
OTU85581	Clostridium XVIII	0.37766	0.446622	0.304054	0.398987	0.476245	0.33481	0.674834	0.547105	0.101981	0.0567786	0.248763	0.113047	0.578144	0.446489	0.746825	0.663694	0.156008	0.0945479	0.321593	0.199548
OTU15620	Leclercia	-0.387657	-0.399159	-0.517123	-0.573983	0.429462	0.341191	0.256952	0.238762	0.0618744	0.0470735	0.0184942	0.012919	0.572984	0.484844	0.372692	0.341465	0.112394	0.0843957	0.0332772	0.0236932
OTU110170	Dolosicoccus	-0.30283	-0.392915	-0.318821	-0.380613	0.544714	0.344389	0.536912	0.477392	0.202146	0.0966301	0.184408	0.132356	0.629075	0.46312	0.637978	0.602559	0.249028	0.143742	0.237596	0.195426
OTU3226	Christensenella	0.418648	0.414087	0.314202	0.221668	0.364487	0.348278	0.580098	0.743764	0.0802379	0.0893358	0.211832	0.36851	0.445122	0.431562	0.645665	0.759446	0.0990871	0.113611	0.254327	0.36783
OTU3102	Pseudobutyrivibrio	0.363073	0.371338	0.2937	0.346224	0.381276	0.354207	0.601954	0.543569	0.0884739	0.0789236	0.198003	0.131721	0.529993	0.490367	0.705578	0.658105	0.160421	0.143261	0.307852	0.224057
OTU3248	Stomatobaculum	0.299904	0.396901	0.333296	0.291361	0.512597	0.354446	0.622222	0.722249	0.122451	0.0603264	0.194407	0.266591	0.571876	0.398425	0.548766	0.671808	0.188277	0.0970288	0.162475	0.236876
OTU2112	Cupriavidus	-0.274483	-0.347721	-0.242309	-0.260772	0.536999	0.362262	0.621762	0.655579	0.146068	0.0702846	0.204724	0.206878	0.579263	0.453113	0.692535	0.71803	0.145905	0.0902506	0.238551	0.232839
OTU1930	Ethanoligenens	0.373055	0.408271	0.378062	0.267165	0.45511	0.369846	0.556407	0.763443	0.122997	0.104079	0.195162	0.390084	0.510991	0.424331	0.578392	0.775575	0.138935	0.106927	0.1864	0.371546
OTU86540	Senegalimassilia	0.331054	0.380184	0.317732	0.180527	0.453539	0.382365	0.618242	0.771894	0.077065	0.0629567	0.165474	0.313499	0.499608	0.42458	0.592378	0.701343	0.102324	0.0828751	0.163021	0.246086
OTU85584	Intestinibacter	0.456108	0.387407	0.316152	0.416207	0.323308	0.38376	0.606981	0.526356	0.0557373	0.0969373	0.221344	0.128761	0.346428	0.392157	0.625768	0.567472	0.0543354	0.0991006	0.21619	0.153805
OTU43016	Parasporobacterium	0.357631	0.361981	0.347543	0.405826	0.439142	0.391821	0.559101	0.488302	0.130362	0.11886	0.213333	0.119051	0.499837	0.459266	0.576908	0.523813	0.162412	0.168069	0.224286	0.154564
OTU6051	Stenotrophomonas	-0.313034	-0.410676	-0.361547	-0.281107	0.593041	0.394775	0.55766	0.62984	0.20833	0.0916008	0.157428	0.203464	0.690075	0.5436	0.692351	0.74723	0.267629	0.155277	0.23897	0.296895
OTU3078	Parasutterella	0.342565	0.335091	0.586394	0.526483	0.51125	0.39701	0.163533	0.338852	0.132705	0.0870591	0.00964696	0.0342968	0.640956	0.537189	0.185975	0.341224	0.242093	0.185813	0.0255397	0.0441413
OTU3184	Victivallis	0.33684	0.366069	0.416985	0.289837	0.484622	0.410666	0.437052	0.662885	0.155446	0.12743	0.104415	0.264858	0.555937	0.484977	0.540324	0.727192	0.201525	0.163878	0.171726	0.327449
OTU19541	Siccibacter	-0.365336	-0.376765	-0.495949	-0.594741	0.463162	0.412886	0.335801	0.310536	0.0780909	0.0759533	0.0347485	0.0244699	0.602212	0.542643	0.441027	0.410215	0.147436	0.128943	0.0525716	0.0389007
OTU4045	Megamonas	0.376268	0.345726	0.222358	0.224997	0.394761	0.420905	0.691597	0.773761	0.092217	0.123465	0.332723	0.409772	0.472612	0.464417	0.695128	0.745675	0.139285	0.157561	0.360178	0.365477
OTU3257	Acidaminobacter	0.334312	0.346749	0.234194	0.315646	0.453873	0.421425	0.662935	0.642287	0.129176	0.138643	0.288016	0.251028	0.537726	0.497831	0.727011	0.710671	0.179703	0.185871	0.358011	0.326607
OTU8945	Atopococcus	-0.28924	-0.364505	-0.312803	-0.339689	0.563024	0.42435	0.579847	0.640712	0.209052	0.130185	0.216319	0.271107	0.654923	0.514763	0.666836	0.714904	0.270225	0.166467	0.269687	0.315335
OTU78844	Alloprevotella	0.315081	0.394565	0.455897	0.488037	0.551679	0.424409	0.420631	0.502129	0.125478	0.0757988	0.0552506	0.0743094	0.595275	0.47021	0.329683	0.432702	0.135322	0.0833224	0.0251669	0.0413352
OTU106382	ZB3_genera_incertae_sedis	-0.285777	-0.361533	-0.338722	-0.36748	0.520281	0.429407	0.467939	0.496501	0.188956	0.141882	0.158409	0.162177	0.574438	0.480315	0.536471	0.553602	0.210141	0.153338	0.174713	0.161714
OTU3094	Elusimicrobium	0.315343	0.33267	0.415149	0.259893	0.436167	0.436556	0.373199	0.576655	0.119807	0.130686	0.0777117	0.166652	0.425019	0.395699	0.41199	0.591726	0.0896293	0.085426	0.0666136	0.147015
OTU6122	Hydrogenoanaerobacterium	0.35186	0.406472	0.326255	0.186099	0.513444	0.440322	0.675212	0.821269	0.159015	0.131284	0.28635	0.490695	0.517465	0.452649	0.695805	0.827861	0.131166	0.106321	0.277106	0.475724
OTU110464	Phaseolibacter	-0.321419	-0.352111	-0.351679	-0.31114	0.449506	0.441001	0.458117	0.554169	0.122729	0.14376	0.113829	0.158087	0.577597	0.564027	0.585816	0.670282	0.198653	0.221169	0.18022	0.233295
OTU63358	Gallibacterium	0.313225	0.368129	0.246543	0.286899	0.559616	0.441708	0.719037	0.632385	0.155827	0.105836	0.309269	0.180867	0.619838	0.522366	0.731414	0.634374	0.215365	0.175988	0.350258	0.218758
OTU1627	Acetitomaculum	0.332302	0.33584	0.413359	0.265241	0.518446	0.451531	0.47942	0.70291	0.189387	0.161941	0.149335	0.313741	0.543984	0.488609	0.529286	0.684188	0.182725	0.177546	0.160334	0.27398
OTU11063	Salmonella	-0.322839	-0.368318	-0.45828	-0.480858	0.529861	0.451695	0.395437	0.412889	0.111045	0.0897852	0.0493173	0.0456647	0.64435	0.567894	0.549213	0.550882	0.17088	0.134622	0.0873985	0.0789566
Green genera: significant in 2 tests, with varying minimum read cutoffs for presence of Blastocystis
Red genera: significant in 3-4 tests, with varying minimum read cutoffs for presence of Blastocystis
Sorted by Wilcoxon FDR corrected p-value, for tests with minimum 5 Blastocystis reads. Top 100 bacterial genera shown.

## Sheet: TableS7
Table S7. Association between eukaryote carriage or HIV reactivity and bacterial diversity
		Difference in bacterial diversity (p)6
Eukaryotic organism, virus	Carriage (Total samples)5	Richness	Chao1	Shannon	Simpson	Bacterial data type
Blastocystis1	15 (44)	0.0320983	0.00961235	0.00595467	0.0230164	OTU (rarefied minimum depth)
		0.00308267	0.00156892	0.00595467	0.041362	genus-level (rarefied minimum depth)
		0.00700821	0.00595467	0.00299891	0.0200487	OTU
		0.00173258	0.00463432	0.00646269	0.0467626	genus-level
Cryptosporidium1	12 (44)	0.630343	0.82515	0.213803	0.784898	OTU (rarefied minimum depth)
		0.781966	0.411595	0.396813	0.213803	genus-level (rarefied minimum depth)
		0.92753	0.725586	0.266698	0.764974	OTU
		0.874345	0.989634	0.426691	0.213803	genus-level
Enterocytozoon2	12 (46)	0.683732	0.561474	0.950819	0.757688	OTU (rarefied minimum depth)
		0.105653	0.324864	0.0894341	0.147231	genus-level (rarefied minimum depth)
		0.595347	0.647784	0.97048	0.757688	OTU
		0.367703	0.379452	0.496583	0.327693	genus-level
Giardia3	14 (40)	0.0975209	0.103527	0.109815	0.0714513	OTU (rarefied minimum depth)
		0.0346065	0.0548779	0.0586959	0.0917891	genus-level (rarefied minimum depth)
		0.254301	0.199627	0.123268	0.0811181	OTU
		0.0520557	0.0714513	0.0548779	0.0917891	genus-level
HIV4	18 (40)	0.171665	0.286371	0.0546192	0.0582474	OTU (rarefied minimum depth)
		0.634471	0.683732	0.512433	0.315486	genus-level (rarefied minimum depth)
		0.366495	0.492401	0.0546192	0.0546192	OTU
		0.454623	0.903742	0.0794201	0.155069	genus-level
1Blastocystis and Cryptosporidium carriage are defined as ≥5 18S reads
2Enterocytozoon carriage is defined as ≥5 transITS reads
2Giardia carriage is diagnosed by Luminex GPP test
4HIV-reactivity by rapid antibody testing
5Total organisms tested for carriage are indicated in brackets
6Statistical significance tested with Wilcoxon Rank Sum test

## Sheet: TableS8
Table S8. Association between eukaryote abundance and clinical characteristics of patients hospitalized for SAM
Blastocystis	OR	95% CI	p	FDR-p
HIV reactivity	0.69	0.17-2.58	0.6	0.96
Edema status	0.81	0.11-5.91	0.8	1
Weight-for-height, z-score	1.01	0.63-1.62	1	1
Diarrhea	0.87	0.14-4.20	0.9	1
Cryptosporidium
HIV reactivity	0.69	0.15-2.92	0.6	1
Edema status	0.006	.0001-0.13	0.004	0.064
Weight-for-height, z-score	0.58	0.3-0.99	0.0627	0.3344
Diarrhea	0.16	0.007-1.33	0.1	0.4
Giardia
HIV reactivity	0.2	0.04-0.82	0.0349	0.2792
Edema status	1.22	0.14-10.2	0.8544	1
Weight-for-height, z-score	1.34	0.80-2.42	0.285	0.651429
Diarrhea	0.32	0.04-1.85	0.234	0.651429
Enterocytozoon
HIV reactivity	2.04	0.58-7.41	0.27	0.651429
Edema status	1.44	0.24-9.33	0.69	1
Weight-for-height, z-score	0.82	0.5-1.29	0.4	0.8
Diarrhea	1.04	0.19-4.85	0.96	1
